# Supplementary material for: Label-free monitoring of crystalline chitin hydrolysis by chitinase based on Raman spectroscopy
Source: Royal Society of Chemistry journal article supplement (doi:10.1039/d1an00581b), 2021-01-01
Supplement: d1an00581b1.pdf [file d1an00581b1.pdf]

## Supporting Information

### **Label-free monitoring of crystalline chitin hydrolysis by chitinase based on Raman spectroscopy**

Jun Ando<sup>1,2,3 †</sup>, Hiroyuki Kawagoe<sup>1 †</sup>, Akihiko Nakamura<sup>2,3,4</sup>, Ryota Iino<sup>2,3</sup>, Katsumasa Fujita<sup>1,5,6 \*</sup>

<sup>1</sup>Department of Applied Physics, Osaka University, 2-1 Yamadaoka, Suita, Osaka 565-0871, Japan

<sup>2</sup>Institute for Molecular Science, National Institutes of Natural Sciences, 5-1 Higashiyama, Myodaiji, Okazaki, Aichi 444-8787, Japan

<sup>3</sup>Department of Functional Molecular Science, School of Physical Sciences, SOKENDAI (The Graduate University for Advanced Studies), Hayama, Kanagawa 240-0193, Japan

<sup>4</sup>Department of Applied Life Sciences, Shizuoka University, Shizuoka, Shizuoka 422-8529, Japan

<sup>5</sup>Advanced Photonics and Biosensing Open Innovation Laboratory, AIST-Osaka University, Osaka University, 2-1 Yamadaoka, Suita, Osaka 565-0871, Japan

<sup>6</sup>Institute for Open and Transdisciplinary Research Initiatives, Osaka University, 2-1 Yamadaoka, Suita, Osaka 565-0871, Japan

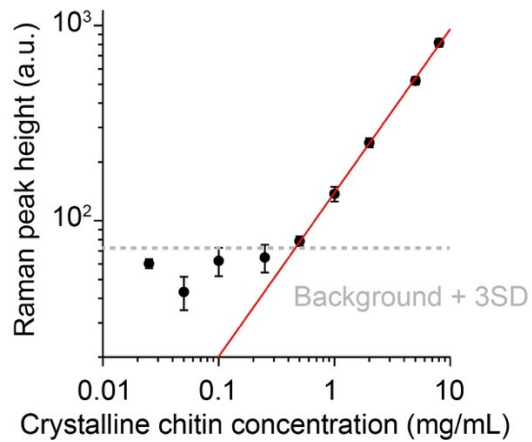

**Fig. S1** Relationship between crystalline chitin concentration and Raman peak height at 2995  $\text{cm}^{-1}$ . The peak height was calculated by subtracting the Raman intensity of 3026  $\text{cm}^{-1}$  from that of 2995  $\text{cm}^{-1}$ . The red line represents a linear fit applied to the dataset of crystalline chitin concentrations from 0.5 to 8.0 mg/mL. Error bars represent SD ( $n=3$ ). The gray dotted line represents a level of background signal plus three times SD of the background.

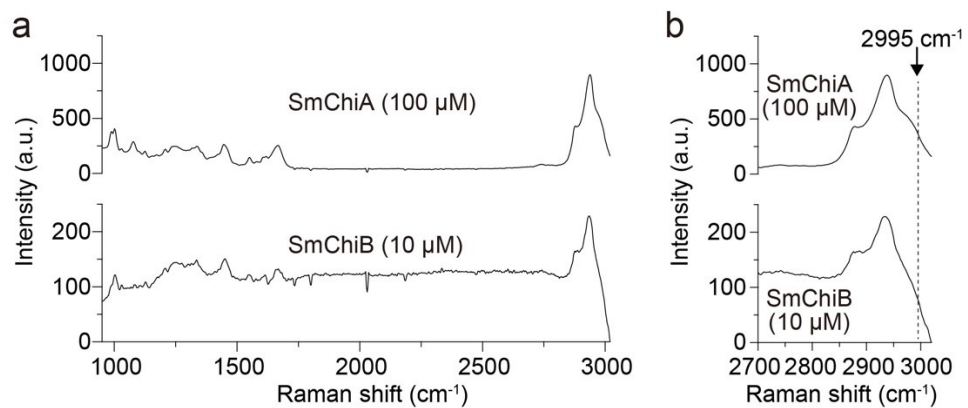

**Fig. S2** Raman spectra of SmChiA and SmChiB at a spectral range between (a) 950 and 3020 cm<sup>-1</sup>, and (b) 2700 and 3020 cm<sup>-1</sup>. The vertical axis of the SmChiB spectrum was magnified 5 times compared to that of SmChiA. The concentrations of SmChiA and SmChiB were 100 μM and 10 μM, respectively.
